# Supplementary material for: Isorhamnetin Regulates Programmed Death Ligand-1 Expression by Suppressing the EGFR–STAT3 Signaling Pathway in Canine Mammary Tumors
Source: MDPI journal article supplement (doi:10.3390/ijms25010670), 2024-01-04
Supplement: s1 [file s1]

## Supplementary Figures and legends

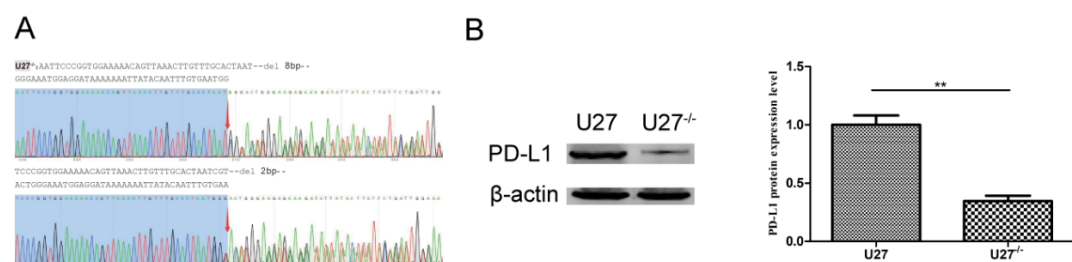

**Figure S1.** Nucleotide sequencing of *CD274* in U27<sup>-/-</sup> and PD-L1 expression in U27 and U27<sup>-/-</sup> cell. (A) Sequence determination of Knockout *CD274* in U27<sup>-/-</sup> cell. (B) PD-L1 expression in U27 and U27<sup>-/-</sup> cell. Data are mean  $\pm$ SD. (n = 3, \*\*  $p < 0.01$  on t-test)

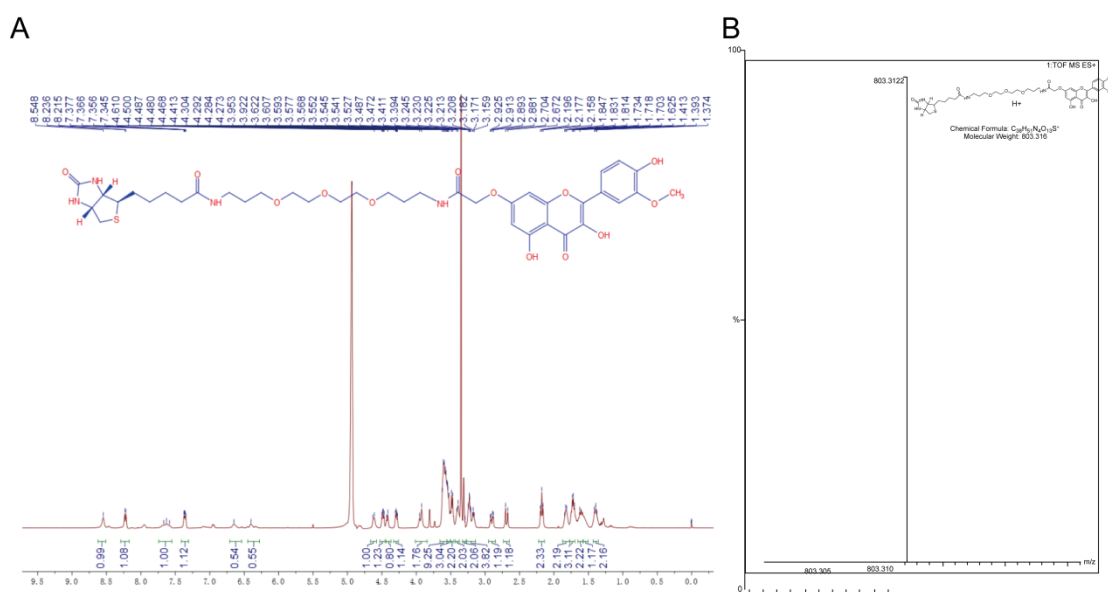

**Figure S2.** (A) <sup>1</sup>H NMR of ISO-PROTAC linker 24-biotin. <sup>1</sup>H NMR (400 MHz, Methanol-d<sub>4</sub>)  $\delta$  8.55 (s, 1H), 8.23 (d, J = 8.4 Hz, 1H), 7.63 (t, J = 16.8 Hz, 1H), 7.36 (dd, J = 8.4, 4.2 Hz, 1H), 6.65 (s, 1H), 6.40 (s, 1H), 4.62 (d, J = 7.8 Hz, 1H), 4.48 (dd, J = 7.7, 5.0 Hz, 1H), 4.42 (d, J = 7.3 Hz, 1H), 4.29 (dd, J = 7.9, 4.4 Hz, 1H), 3.94 (d, J = 12.4 Hz, 2H), 3.66 – 3.56 (m, 9H), 3.55 – 3.51 (m, 3H), 3.48 (d, J = 6.0 Hz, 2H), 3.40 (d, J = 7.0 Hz, 2H), 3.29 (s, 2H), 3.27 – 3.14 (m, 4H), 2.90 (dd, J = 12.9, 4.8 Hz, 1H), 2.69 (d, J = 12.7 Hz, 1H), 2.18 (t, J = 7.4 Hz, 2H), 1.83 (t, J = 6.4 Hz, 2H), 1.77 – 1.70 (m, 3H), 1.60 (d, J = 16.9 Hz, 2H), 1.39 (t, J = 7.8 Hz, 2H). (B) Ion to mass charge ratio (m/z) mapping. m/z calcd for C<sub>38</sub>H<sub>51</sub>N<sub>4</sub>O<sub>13</sub>S + 803.3168, found: 803.3122.

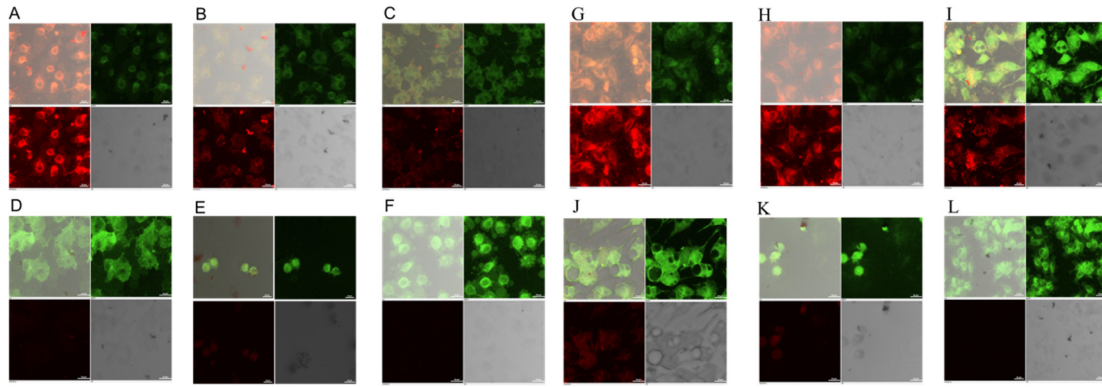

**Figure S3. ISO induces apoptosis by decreasing the mitochondrial membrane potential in U27 (A–F) and U27<sup>-/-</sup> cells (G–L).** (A,G) control group; cells treated with 10  $\mu$ M ISO (B,H), 20  $\mu$ M ISO (C,I), 40  $\mu$ M ISO (D,J), gefitinib (10  $\mu$ M) (E,K), or CCCP (F,L). Increasing drug concentration resulted in increased green fluorescence and cellular damage.

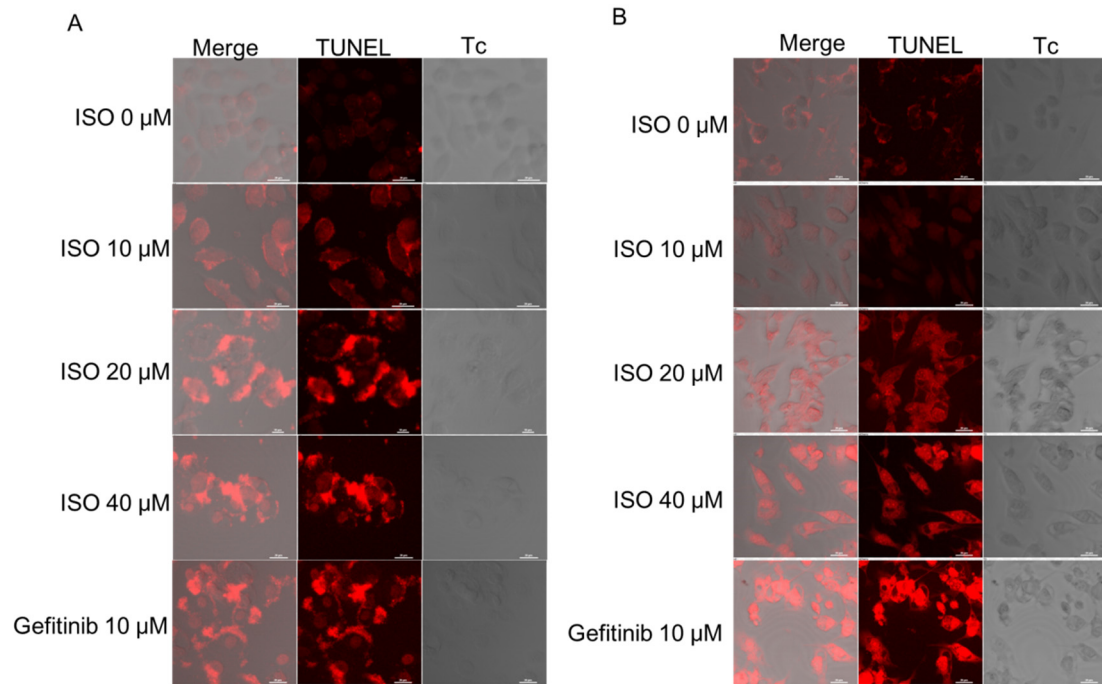

**Figure S4. Detection of ISO-induced apoptosis in U27(A) and U27<sup>-/-</sup> (B) cells by TUNEL assays.** ISO induced apoptosis of U27 cells along a concentration gradient (A) and reduced apoptosis in U27<sup>-/-</sup> cells (B). With the increase in drug concentration, both the red fluorescence and degree of apoptosis of cells increased.

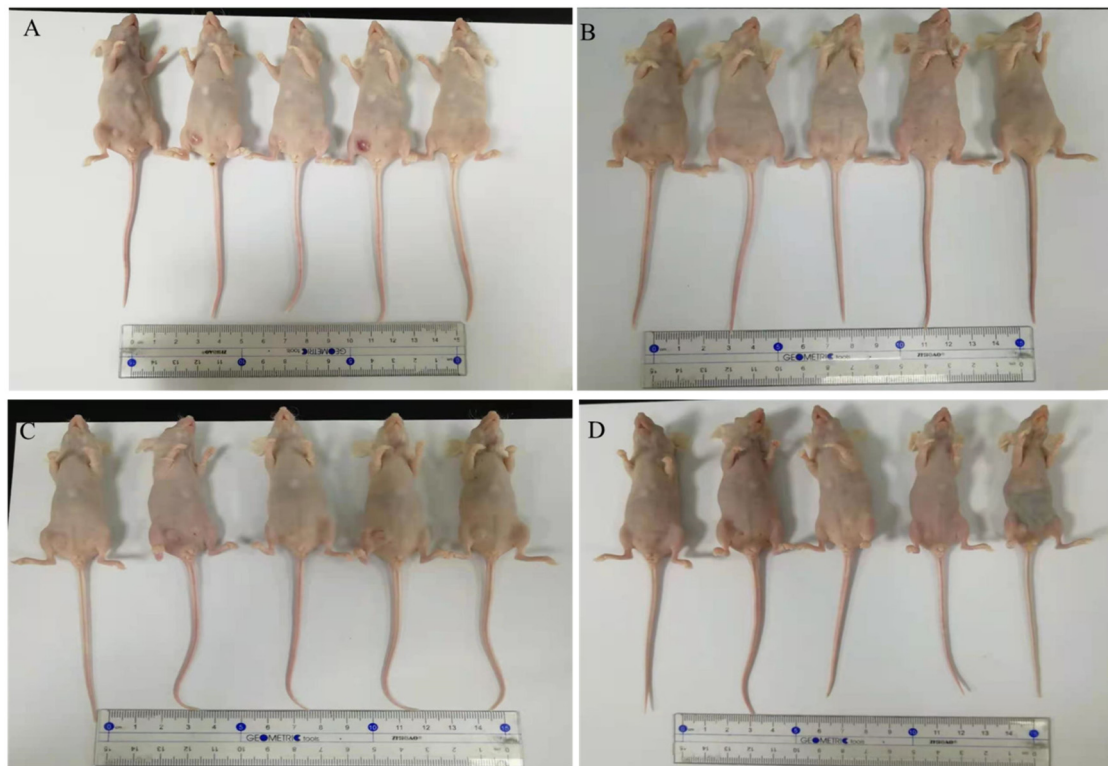

**Figure S5. ISO inhibits mammary tumor growth in U27 and U27<sup>-/-</sup> xenograft mice. (A)** control group with U27 treated. **(B)** ISO (50mg/kg) group with U27 treated. **(C)** control group with U27<sup>-/-</sup> treated. **(D)** ISO (50mg/kg) group with U27<sup>-/-</sup> treated.

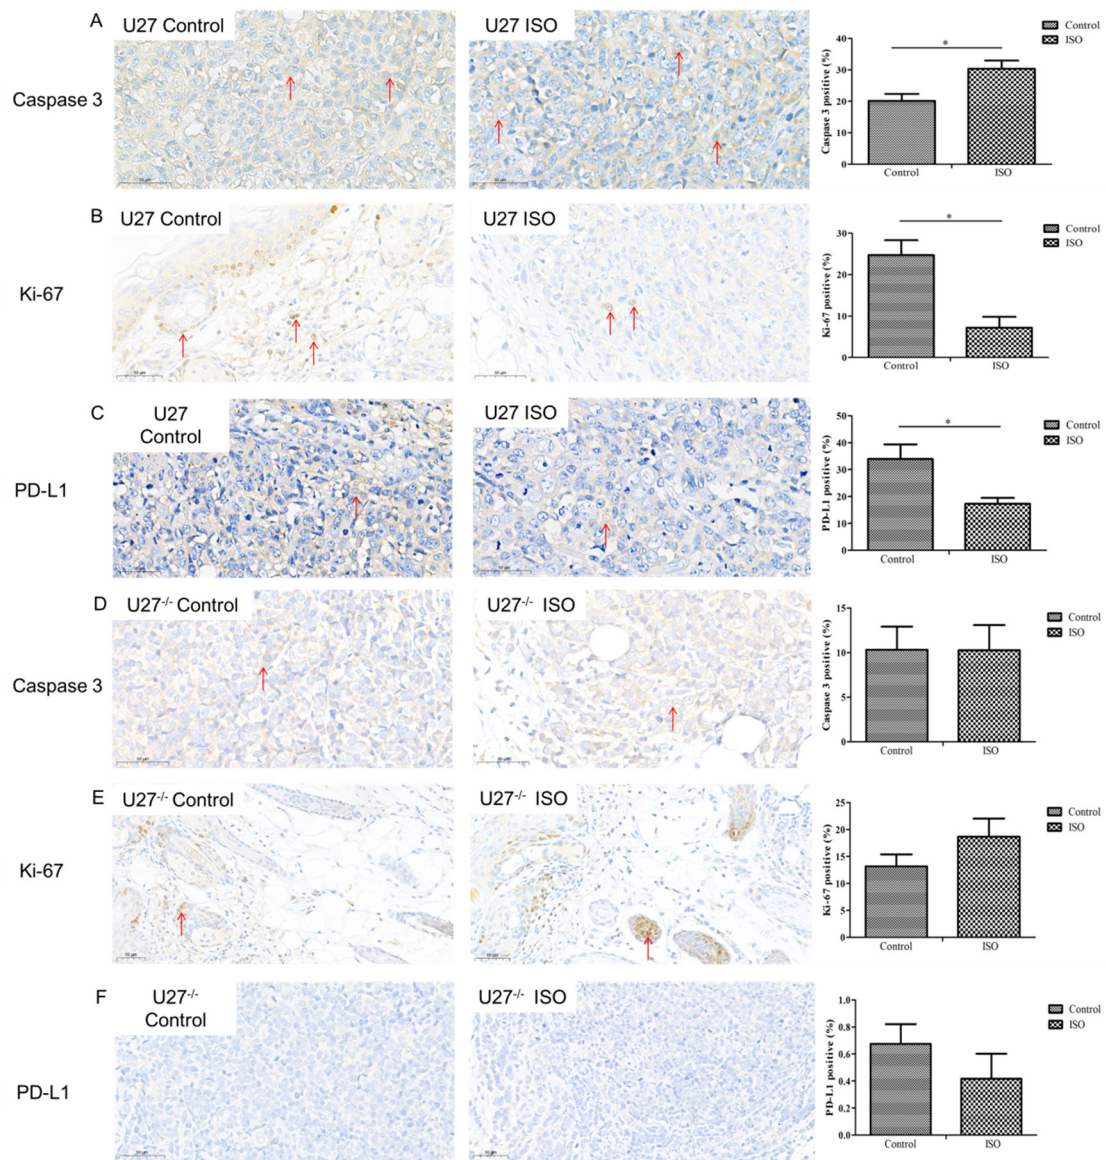

**Figure S6.** Immunohistochemical of cells and quantification in U27-treated control and ISO-treated mice (400X) and in U27<sup>-/-</sup>-treated control and ISO-treated mice tissues for (A, D), Caspase3, (B, E) Ki-67, (C, F) PD-L1.

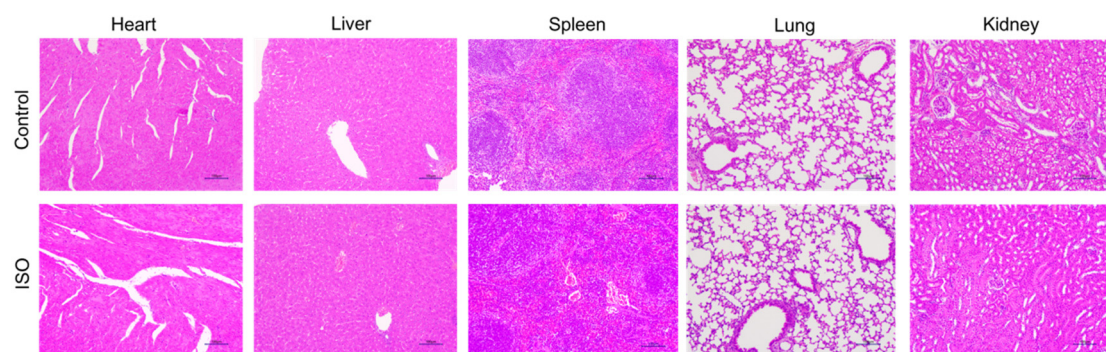

**Figure S7.** ISO shows low toxicity in a mouse model. H&E staining of various organs from control and ISO-treated mice (n=3).



|                |         |                                                                                                                   |    |   |   |   |      |       |
|----------------|---------|-------------------------------------------------------------------------------------------------------------------|----|---|---|---|------|-------|
| F1PYU9         | KRT10   | Keratin, type I cytoskeletal 10<br>OS=Canis lupus familiaris<br>OX=9615 GN=KRT10 PE=3<br>SV=2                     | 11 | 8 | 8 | 7 | 568  | 57.7  |
| F1Q0B0         | NCL     | Nucleolin OS=Canis lupus<br>familiaris OX=9615 GN=NCL<br>PE=4 SV=2                                                | 10 | 7 | 7 | 7 | 715  | 77.4  |
| A0A5F4C<br>AZ7 | ATP1A1  | Sodium/potassium-transporting<br>ATPase subunit alpha OS=Canis<br>lupus familiaris OX=9615<br>GN=ATP1A1 PE=3 SV=1 | 8  | 7 | 7 | 7 | 1028 | 113.8 |
| E2R0T6         | HSPA8   | Heat shock protein family A<br>(Hsp70) member 8 OS=Canis<br>lupus familiaris OX=9615<br>GN=HSPA8 PE=3 SV=1        | 15 | 8 | 8 | 6 | 646  | 70.9  |
| Q6EII9         | KRT1    | Keratin, type II cytoskeletal 1<br>OS=Canis lupus familiaris<br>OX=9615 GN=KRT1 PE=2<br>SV=1                      | 8  | 6 | 6 | 6 | 619  | 63.8  |
| F1PBJ3         | LMNA    | Lamin A/C OS=Canis lupus<br>familiaris OX=9615 GN=LMNA<br>PE=3 SV=2                                               | 10 | 6 | 6 | 6 | 751  | 82.7  |
| A0A5F4D<br>8X1 | HDLBP   | High density lipoprotein binding<br>protein OS=Canis lupus familiaris<br>OX=9615 GN=HDLBP PE=4<br>SV=1            | 5  | 5 | 6 | 5 | 1569 | 171.2 |
| A0A5S6C<br>Y29 | ACTB    | Actin, cytoplasmic 1 OS=Canis<br>lupus familiaris OX=9615<br>GN=ACTB PE=3 SV=1                                    | 21 | 5 | 5 | 5 | 400  | 44.5  |
| F1PAR8         | PHB     | Prohibitin OS=Canis lupus<br>familiaris OX=9615 GN=PHB<br>PE=3 SV=2                                               | 22 | 5 | 5 | 5 | 262  | 28.9  |
| A0A5F4C<br>W76 | ATP5F1B | ATP synthase subunit beta<br>OS=Canis lupus familiaris<br>OX=9615 GN=ATP5F1B PE=3<br>SV=1                         | 11 | 5 | 5 | 5 | 640  | 70.2  |
| A0A140T<br>8E6 | JUP     | Junction plakoglobin OS=Canis<br>lupus familiaris OX=9615<br>GN=JUP PE=3 SV=1                                     | 8  | 5 | 5 | 5 | 744  | 81.7  |
| A0A5F4B<br>S50 | MTHFD1L | Formyltetrahydrofolate synthetase<br>OS=Canis lupus familiaris<br>OX=9615 GN=MTHFD1L PE=3<br>SV=1                 | 6  | 5 | 5 | 5 | 908  | 98.1  |
| E2RSI6         | EZR     | Ezrin OS=Canis lupus familiaris<br>OX=9615 GN=EZR PE=4 SV=1                                                       | 7  | 4 | 5 | 4 | 586  | 69.4  |

|                |           |                                                                                                              |    |   |   |   |      |       |
|----------------|-----------|--------------------------------------------------------------------------------------------------------------|----|---|---|---|------|-------|
| E2QUU5         | HSPD1     | 60 kDa chaperonin OS=Canis lupus familiaris OX=9615<br>GN=HSPD1 PE=3 SV=2                                    | 9  | 4 | 4 | 4 | 573  | 61    |
| J9NXT1         | LOC608051 | Tubulin alpha chain OS=Canis lupus familiaris OX=9615<br>GN=LOC608051 PE=3 SV=1                              | 12 | 4 | 4 | 4 | 450  | 49.9  |
| L7N095         | KRT75     | Keratin 75 OS=Canis lupus familiaris OX=9615 GN=KRT75<br>PE=3 SV=2                                           | 6  | 4 | 4 | 4 | 565  | 60.2  |
| A0A5F4C<br>R13 | COPA      | Coatomer subunit alpha OS=Canis lupus familiaris OX=9615 GN=COPA PE=4<br>SV=1                                | 4  | 4 | 4 | 4 | 1115 | 126.1 |
| F6XTD9         | NUP155    | Nucleoporin 155 OS=Canis lupus familiaris OX=9615<br>GN=NUP155 PE=3 SV=1                                     | 4  | 4 | 4 | 4 | 1390 | 155   |
| E2RLQ9         | VCP       | 15S Mg(2+)-ATPase p97 subunit OS=Canis lupus familiaris OX=9615 GN=VCP PE=3 SV=3                             | 6  | 4 | 4 | 4 | 806  | 89.2  |
| A0A5F4D<br>J40 | PHB2      | Prohibitin OS=Canis lupus familiaris OX=9615 GN=PHB2<br>PE=3 SV=1                                            | 19 | 4 | 4 | 4 | 267  | 29.8  |
| E2RLS3         | HSP90AB1  | HATPase_c domain-containing protein OS=Canis lupus familiaris OX=9615 GN=HSP90AB1 PE=3<br>SV=2               | 9  | 6 | 6 | 3 | 724  | 83.2  |
| F6XV93         | LONP1     | Lon protease homolog, mitochondrial OS=Canis lupus familiaris OX=9615 GN=LONP1<br>PE=3 SV=2                  | 4  | 3 | 3 | 3 | 960  | 106.6 |
| A0A5F4C<br>634 | ATP2A2    | Sarcoplasmic/endoplasmic reticulum calcium ATPase 2 OS=Canis lupus familiaris OX=9615 GN=ATP2A2 PE=4<br>SV=1 | 4  | 3 | 3 | 3 | 1001 | 109.8 |
| F1PLG2         | NNT       | Proton-translocating NAD(P)(+) transhydrogenase OS=Canis lupus familiaris OX=9615<br>GN=NNT PE=3 SV=3        | 4  | 3 | 3 | 3 | 1104 | 115.5 |
| A0A5F4C<br>137 | SND1      | Staphylococcal nuclease domain-containing protein OS=Canis lupus familiaris OX=9615 GN=SND1 PE=4<br>SV=1     | 4  | 3 | 3 | 3 | 853  | 95.6  |

|                |          |                                                                                                                              |    |   |   |   |      |       |
|----------------|----------|------------------------------------------------------------------------------------------------------------------------------|----|---|---|---|------|-------|
| F1P8B4         | CANX     | Calnexin OS=Canis lupus familiaris OX=9615 GN=CANX PE=3 SV=2                                                                 | 4  | 3 | 3 | 3 | 591  | 67.2  |
| F1PM56         | CPT1A    | Carnitine O-palmitoyltransferase OS=Canis lupus familiaris OX=9615 GN=CPT1A PE=3 SV=1                                        | 4  | 3 | 3 | 3 | 773  | 88.1  |
| J9P425         | CD79A    | 40S ribosomal protein S19 OS=Canis lupus familiaris OX=9615 GN=CD79A PE=3 SV=2                                               | 19 | 3 | 3 | 3 | 145  | 16.1  |
| F1Q0R0         | KRT14    | Keratin 14 OS=Canis lupus familiaris OX=9615 GN=KRT14 PE=3 SV=3                                                              | 5  | 4 | 4 | 2 | 531  | 57.6  |
| J9NSW0         | TRAP1    | TNF receptor associated protein 1 OS=Canis lupus familiaris OX=9615 GN=TRAP1 PE=3 SV=2                                       | 5  | 3 | 3 | 2 | 832  | 93.3  |
| E2QYZ0         | ALDH18A1 | Delta-1-pyrroline-5-carboxylate synthase OS=Canis lupus familiaris OX=9615 GN=ALDH18A1 PE=3 SV=1                             | 3  | 2 | 2 | 2 | 795  | 87.2  |
| A0A5F4C<br>WM9 | MYH9     | Myosin-9 OS=Canis lupus familiaris OX=9615 GN=MYH9 PE=3 SV=1                                                                 | 1  | 2 | 2 | 2 | 1981 | 229   |
| F6Y258         | GTF2I    | General transcription factor Ili OS=Canis lupus familiaris OX=9615 GN=GTF2I PE=4 SV=1                                        | 3  | 2 | 2 | 2 | 999  | 112.4 |
| A0A5F4B<br>SL9 |          | Uncharacterized protein OS=Canis lupus familiaris OX=9615 PE=3 SV=1                                                          | 25 | 2 | 2 | 2 | 106  | 12.4  |
| E2RQ08         | RPN1     | Dolichyl-diphosphooligosaccharide--protein glycosyltransferase subunit 1 OS=Canis lupus familiaris OX=9615 GN=RPN1 PE=1 SV=1 | 4  | 2 | 2 | 2 | 607  | 68.5  |
| A0A5F4D<br>104 | EGFR     | Receptor protein-tyrosine kinase OS=Canis lupus familiaris OX=9615 GN=EGFR PE=4 SV=1                                         | 3  | 2 | 2 | 2 | 1138 | 126.9 |
| E2QW85         |          | Elongation factor 1-alpha OS=Canis lupus familiaris OX=9615 PE=3 SV=2                                                        | 5  | 2 | 2 | 2 | 461  | 49.9  |

|                |          |                                                                                                                                       |    |   |   |   |      |       |
|----------------|----------|---------------------------------------------------------------------------------------------------------------------------------------|----|---|---|---|------|-------|
| F2Z4Q6         | AFP      | Alpha fetoprotein OS=Canis lupus familiaris OX=9615<br>GN=AFP PE=4 SV=2                                                               | 2  | 2 | 2 | 2 | 637  | 71.9  |
| F6XRY2         | EEF2     | Eukaryotic translation elongation factor 2 OS=Canis lupus familiaris OX=9615 GN=EEF2<br>PE=3 SV=1                                     | 3  | 2 | 2 | 2 | 858  | 95.3  |
| L7N0I7         | TUBB4B   | Tubulin beta chain OS=Canis lupus familiaris OX=9615<br>GN=TUBB4B PE=3 SV=1                                                           | 5  | 2 | 2 | 2 | 445  | 49.8  |
| Q6TEQ7         | ANXA2    | Annexin A2 OS=Canis lupus familiaris OX=9615 GN=ANXA2<br>PE=1 SV=1                                                                    | 6  | 2 | 2 | 2 | 339  | 38.6  |
| A0A5F4D<br>I88 | PRDX4    | Peroxiredoxin 4 OS=Canis lupus familiaris OX=9615 GN=PRDX4<br>PE=4 SV=1                                                               | 8  | 2 | 2 | 2 | 257  | 29.3  |
| A0A5F4B<br>SS2 | HSPA9    | 75 kDa glucose-regulated protein OS=Canis lupus familiaris OX=9615 GN=HSPA9 PE=3<br>SV=1                                              | 4  | 2 | 2 | 2 | 625  | 67.4  |
| Q28298         | RRBP1    | Ribosome-binding protein 1 OS=Canis lupus familiaris OX=9615 GN=RRBP1 PE=2<br>SV=1                                                    | 1  | 2 | 2 | 2 | 1534 | 164.5 |
| F1PPF7         | HK1      | Hexokinase OS=Canis lupus familiaris OX=9615 GN=HK1<br>PE=3 SV=3                                                                      | 2  | 2 | 2 | 2 | 935  | 104.2 |
| E2RI34         | RPL27A   | 60S ribosomal protein L27a OS=Canis lupus familiaris OX=9615 GN=RPL27A PE=3<br>SV=1                                                   | 14 | 2 | 2 | 2 | 148  | 16.6  |
| A0A5F4D<br>3H8 | DDOST    | Dolichyl-diphosphooligosaccharide--protein glycosyltransferase 48 kDa subunit OS=Canis lupus familiaris OX=9615 GN=DDOST<br>PE=3 SV=1 | 5  | 2 | 2 | 2 | 442  | 49.1  |
| F1Q0N9         | KRT14    | Keratin 14 OS=Canis lupus familiaris OX=9615 GN=KRT14<br>PE=3 SV=2                                                                    | 5  | 3 | 3 | 1 | 494  | 52.9  |
| F1PGY1         | HSP90AA1 | Heat shock protein 90 alpha family class A member 1 OS=Canis lupus familiaris OX=9615 GN=HSP90AA1 PE=3<br>SV=3                        | 5  | 2 | 2 | 1 | 542  | 63.6  |

|                |           |                                                                                                 |   |   |   |   |      |       |
|----------------|-----------|-------------------------------------------------------------------------------------------------|---|---|---|---|------|-------|
| E2RNT3         | DHX9      | DEAH box protein 9 OS=Canis lupus familiaris OX=9615 GN=DHX9 PE=3 SV=1                          | 1 | 1 | 2 | 1 | 1276 | 141.2 |
| O18740         | KRT9      | Keratin, type I cytoskeletal 9 OS=Canis lupus familiaris OX=9615 GN=KRT9 PE=3 SV=1              | 2 | 2 | 2 | 1 | 786  | 76.3  |
| A0A5F4B<br>RW6 | POR       | NADPH--hemoprotein reductase OS=Canis lupus familiaris OX=9615 GN=POR PE=4 SV=1                 | 1 | 1 | 2 | 1 | 656  | 74.2  |
| A0A5F4C<br>UN5 | KTN1      | Kinectin 1 OS=Canis lupus familiaris OX=9615 GN=KTN1 PE=4 SV=1                                  | 1 | 1 | 1 | 1 | 1401 | 160.3 |
| F1P6B7         | ANXA1     | Annexin OS=Canis lupus familiaris OX=9615 GN=ANXA1 PE=3 SV=1                                    | 3 | 1 | 1 | 1 | 345  | 38.6  |
| J9P621         | ATP5O     | ATP synthase peripheral stalk subunit OSCP OS=Canis lupus familiaris OX=9615 GN=ATP5O PE=2 SV=1 | 7 | 1 | 1 | 1 | 213  | 23.5  |
| J9P9Z7         | RPS20     | 40S ribosomal protein S20 OS=Canis lupus familiaris OX=9615 GN=RPS20 PE=3 SV=1                  | 9 | 1 | 1 | 1 | 119  | 13.4  |
| F1Q1M2         | IARS2     | Isoleucyl-tRNA synthetase OS=Canis lupus familiaris OX=9615 GN=IARS2 PE=3 SV=3                  | 1 | 1 | 1 | 1 | 963  | 108.1 |
| F1PLR0         | RACK1     | Receptor for activated C kinase 1 OS=Canis lupus familiaris OX=9615 GN=RACK1 PE=4 SV=2          | 4 | 1 | 1 | 1 | 317  | 35.1  |
| A0A5F4C<br>GI3 | DDX5      | DEAD box protein 5 OS=Canis lupus familiaris OX=9615 GN=DDX5 PE=3 SV=1                          | 2 | 1 | 1 | 1 | 535  | 60.5  |
| E2REU6         | KRT18     | IF rod domain-containing protein OS=Canis lupus familiaris OX=9615 GN=KRT18 PE=3 SV=3           | 3 | 1 | 1 | 1 | 431  | 48.2  |
| F1Q342         | LOC489992 | SpaA domain-containing protein OS=Canis lupus familiaris OX=9615 GN=LOC489992 PE=4 SV=2         | 1 | 1 | 1 | 1 | 1132 | 124.5 |

|                |       |                                                                                                                               |    |   |   |   |      |       |
|----------------|-------|-------------------------------------------------------------------------------------------------------------------------------|----|---|---|---|------|-------|
| F2Z4P9         | RAB10 | Ras-related protein Rab-10<br>OS=Canis lupus familiaris<br>OX=9615 GN=RAB10 PE=4<br>SV=1                                      | 6  | 1 | 1 | 1 | 200  | 22.5  |
| F1Q3V2         | ACLY  | ATP-citrate synthase OS=Canis<br>lupus familiaris OX=9615<br>GN=ACLY PE=3 SV=3                                                | 1  | 1 | 1 | 1 | 1134 | 123.9 |
| J9NXR3         | ITGB4 | Integrin beta OS=Canis lupus<br>familiaris OX=9615 GN=ITGB4<br>PE=3 SV=2                                                      | 1  | 1 | 1 | 1 | 1766 | 196.2 |
| F6V9R9         | GLG1  | Golgi apparatus protein 1<br>OS=Canis lupus familiaris<br>OX=9615 GN=GLG1 PE=4<br>SV=1                                        | 1  | 1 | 1 | 1 | 1186 | 134.9 |
| P81709         |       | Lysozyme C, spleen isozyme<br>OS=Canis lupus familiaris<br>OX=9615 PE=1 SV=1                                                  | 9  | 1 | 1 | 1 | 130  | 14.6  |
| F1PEN6         | TFRC  | Transferrin receptor protein 1<br>OS=Canis lupus familiaris<br>OX=9615 GN=TFRC PE=3<br>SV=2                                   | 1  | 1 | 1 | 1 | 918  | 100.9 |
| A0A5F4C<br>4D4 | LETM1 | Leucine<br>zipper-EF-hand-containing<br>transmembrane protein 1<br>OS=Canis lupus familiaris<br>OX=9615 GN=LETM1 PE=3<br>SV=1 | 2  | 1 | 1 | 1 | 765  | 85.7  |
| E2R580         | VAPA  | VAMP associated protein A<br>OS=Canis lupus familiaris<br>OX=9615 GN=VAPA PE=4<br>SV=1                                        | 5  | 1 | 1 | 1 | 249  | 27.8  |
| A0A5F4C<br>NG7 | DSP   | Desmoplakin OS=Canis lupus<br>familiaris OX=9615 GN=DSP<br>PE=4 SV=1                                                          | 0  | 1 | 1 | 1 | 2057 | 236.2 |
| A0A5F4C<br>JR2 | HYOU1 | Hypoxia up-regulated 1<br>OS=Canis lupus familiaris<br>OX=9615 GN=HYOU1 PE=3<br>SV=1                                          | 2  | 1 | 1 | 1 | 678  | 75.3  |
| E2R4F5         | RPL13 | 60S ribosomal protein L13<br>OS=Canis lupus familiaris<br>OX=9615 GN=RPL13 PE=3<br>SV=1                                       | 5  | 1 | 1 | 1 | 211  | 24.3  |
| A0A5F4C<br>6J8 | RPL22 | Uncharacterized protein<br>OS=Canis lupus familiaris<br>OX=9615 GN=RPL22 PE=3<br>SV=1                                         | 10 | 1 | 1 | 1 | 128  | 14.8  |

|                |        |                                                                                                                    |   |   |   |   |      |       |
|----------------|--------|--------------------------------------------------------------------------------------------------------------------|---|---|---|---|------|-------|
| A0A5F4B<br>TP4 | AP1B1  | AP complex subunit beta<br>OS=Canis lupus familiaris<br>OX=9615 GN=AP1B1 PE=3<br>SV=1                              | 1 | 1 | 1 | 1 | 938  | 103.5 |
| E2QWK2         | PNPT1  | Polynucleotide phosphorylase 1<br>OS=Canis lupus familiaris<br>OX=9615 GN=PNPT1 PE=3<br>SV=3                       | 1 | 1 | 1 | 1 | 763  | 83.7  |
| A0A5F4C<br>T43 | PDHA1  | Pyruvate dehydrogenase E1<br>component subunit alpha<br>OS=Canis lupus familiaris<br>OX=9615 GN=PDHA1 PE=4<br>SV=1 | 3 | 1 | 1 | 1 | 405  | 44.9  |
| F1Q3W0         | HNRNPU | Heterogeneous nuclear<br>ribonucleoprotein U OS=Canis<br>lupus familiaris OX=9615<br>GN=HNRNPU PE=4 SV=3           | 1 | 1 | 1 | 1 | 805  | 88.3  |
| F1PTZ5         | CD44   | CD44 antigen OS=Canis lupus<br>familiaris OX=9615 GN=CD44<br>PE=4 SV=3                                             | 1 | 1 | 1 | 1 | 783  | 85.7  |
| A0A5F4B<br>YR1 | UGGT1  | UDP-glucose glycoprotein<br>glucosyltransferase 1 OS=Canis<br>lupus familiaris OX=9615<br>GN=UGGT1 PE=3 SV=1       | 1 | 1 | 1 | 1 | 1557 | 177.9 |
| A0A5F4B<br>U46 | H1-2   | Histone H2B OS=Canis lupus<br>familiaris OX=9615 GN=H1-2<br>PE=3 SV=1                                              | 3 | 1 | 1 | 1 | 435  | 45.7  |
| Q9XSU7         | RPL27  | 60S ribosomal protein L27<br>OS=Canis lupus familiaris<br>OX=9615 GN=RPL27 PE=2<br>SV=3                            | 7 | 1 | 1 | 1 | 136  | 15.8  |
| A0A5F4C<br>JY9 | AFG3L2 | AFG3 like matrix AAA peptidase<br>subunit 2 OS=Canis lupus<br>familiaris OX=9615<br>GN=AFG3L2 PE=3 SV=1            | 1 | 1 | 1 | 1 | 732  | 81.2  |
| E2RIA8         | RPL8   | 60S ribosomal protein L8<br>OS=Canis lupus familiaris<br>OX=9615 GN=RPL8 PE=3 SV=1                                 | 4 | 1 | 1 | 1 | 257  | 28    |
| A0A5F4C<br>2R0 | CTNND1 | Uncharacterized protein<br>OS=Canis lupus familiaris<br>OX=9615 GN=CTNND1 PE=3<br>SV=1                             | 1 | 1 | 1 | 1 | 896  | 100.2 |
| E2R667         | COPB2  | Coatomer subunit beta' OS=Canis<br>lupus familiaris OX=9615<br>GN=COPB2 PE=3 SV=1                                  | 1 | 1 | 1 | 1 | 906  | 102.3 |

|             |            |                                                                                                           |   |   |   |   |      |       |
|-------------|------------|-----------------------------------------------------------------------------------------------------------|---|---|---|---|------|-------|
| F1PCE8      | LOC475521  | Peptidase S1 domain-containing protein OS=Canis lupus familiaris OX=9615 GN=LOC475521 PE=4 SV=1           | 4 | 1 | 1 | 1 | 246  | 26.3  |
| E2RS49      | RPS25      | 40S ribosomal protein S25 OS=Canis lupus familiaris OX=9615 GN=RPS25 PE=3 SV=3                            | 8 | 1 | 1 | 1 | 125  | 13.7  |
| E2RB37      | PDIA6      | Protein disulfide-isomerase A6 OS=Canis lupus familiaris OX=9615 GN=PDIA6 PE=3 SV=1                       | 3 | 1 | 1 | 1 | 440  | 48.3  |
| A0A5F4C XM3 | TAOK3      | TAO kinase 3 OS=Canis lupus familiaris OX=9615 GN=TAOK3 PE=4 SV=1                                         | 1 | 1 | 1 | 1 | 840  | 98.6  |
| J9P4G7      | C17H1orf68 | Chromosome 17 C1orf68 homolog OS=Canis lupus familiaris OX=9615 GN=C17H1orf68 PE=4 SV=2                   | 3 | 1 | 1 | 1 | 271  | 29.1  |
| A0A5F4C 5B7 | SEC24C     | SEC24 homolog C, COPII coat complex component OS=Canis lupus familiaris OX=9615 GN=SEC24C PE=3 SV=1       | 1 | 1 | 1 | 1 | 1093 | 118.6 |
| F1PAA9      | CDH1       | Cadherin-1 OS=Canis lupus familiaris OX=9615 GN=CDH1 PE=1 SV=2                                            | 1 | 1 | 1 | 1 | 885  | 97.7  |
| A0A140T 8E0 | CAPRIN1    | Cell cycle associated protein 1 OS=Canis lupus familiaris OX=9615 GN=CAPRIN1 PE=3 SV=1                    | 2 | 1 | 1 | 1 | 717  | 78.8  |
| E2RFR0      | RPS8       | 40S ribosomal protein S8 OS=Canis lupus familiaris OX=9615 GN=RPS8 PE=3 SV=1                              | 6 | 1 | 1 | 1 | 208  | 24.2  |
| E2R4L7      | SHMT2      | Serine hydroxymethyltransferase OS=Canis lupus familiaris OX=9615 GN=SHMT2 PE=3 SV=3                      | 2 | 1 | 1 | 1 | 549  | 61.3  |
| F2Z4P2      | RPL7A      | 60S ribosomal protein L7a OS=Canis lupus familiaris OX=9615 GN=RPL7A PE=3 SV=3                            | 4 | 1 | 1 | 1 | 266  | 30    |
| E2RQP6      | EIF3C      | Eukaryotic translation initiation factor 3 subunit C OS=Canis lupus familiaris OX=9615 GN=EIF3C PE=3 SV=2 | 1 | 1 | 1 | 1 | 942  | 108.9 |

|                |         |                                                                                                                    |    |   |   |   |      |       |
|----------------|---------|--------------------------------------------------------------------------------------------------------------------|----|---|---|---|------|-------|
| J9PA20         | GLUD1   | Glutamate dehydrogenase<br>(NAD(P)(+)) OS=Canis lupus<br>familiaris OX=9615 GN=GLUD1<br>PE=3 SV=2                  | 2  | 1 | 1 | 1 | 572  | 62.2  |
| A0A5F4C<br>D08 | SEC11A  | Signal peptidase complex<br>catalytic subunit SEC11<br>OS=Canis lupus familiaris<br>OX=9615 GN=SEC11A PE=3<br>SV=1 | 4  | 1 | 1 | 1 | 183  | 21    |
| F1PK90         | DDX46   | RNA helicase OS=Canis lupus<br>familiaris OX=9615 GN=DDX46<br>PE=4 SV=2                                            | 1  | 1 | 1 | 1 | 1032 | 117.4 |
| A0A5F4C<br>0Z8 | GOLGA2  | GOLGA2L5 domain-containing<br>protein OS=Canis lupus familiaris<br>OX=9615 GN=GOLGA2 PE=4<br>SV=1                  | 1  | 1 | 1 | 1 | 987  | 111.5 |
| E2R0B6         | PSMB6   | Proteasome subunit beta<br>OS=Canis lupus familiaris<br>OX=9615 GN=PSMB6 PE=3<br>SV=1                              | 5  | 1 | 1 | 1 | 239  | 25.5  |
| E2RNY7         | ATP5F1C | ATP synthase subunit gamma<br>OS=Canis lupus familiaris<br>OX=9615 GN=ATP5F1C PE=2<br>SV=3                         | 4  | 1 | 1 | 1 | 298  | 33    |
| F1Q4J0         | GANAB   | Glucosidase II alpha subunit<br>OS=Canis lupus familiaris<br>OX=9615 GN=GANAB PE=3<br>SV=2                         | 1  | 1 | 1 | 1 | 944  | 106.3 |
| F1PDG4         | UBB     | Uncharacterized protein<br>OS=Canis lupus familiaris<br>OX=9615 GN=UBB PE=4 SV=2                                   | 21 | 1 | 1 | 1 | 229  | 25.7  |
| E2RR58         | RPL12   | 60S ribosomal protein L12<br>OS=Canis lupus familiaris<br>OX=9615 GN=RPL12 PE=1<br>SV=1                            | 5  | 1 | 1 | 1 | 165  | 17.8  |
| E2R8R8         | TFPT    | 40S ribosomal protein S9<br>OS=Canis lupus familiaris<br>OX=9615 GN=TFPT PE=3 SV=2                                 | 3  | 1 | 1 | 1 | 228  | 26.3  |
| F1PIP0         | HADHA   | Enoyl-CoA hydratase OS=Canis<br>lupus familiaris OX=9615<br>GN=HADHA PE=3 SV=3                                     | 2  | 1 | 1 | 1 | 762  | 82.9  |
| A0A5F4B<br>WP4 | SPATA7  | Spermatogenesis associated 7<br>OS=Canis lupus familiaris<br>OX=9615 GN=SPATA7 PE=4<br>SV=1                        | 1  | 1 | 1 | 1 | 563  | 64.1  |

|        |         |                                                                                                                                              |    |   |   |   |     |      |
|--------|---------|----------------------------------------------------------------------------------------------------------------------------------------------|----|---|---|---|-----|------|
| E2R4X3 | DAD1    | Dolichyl-diphosphooligosacchari<br>de--protein glycosyltransferase<br>subunit DAD1 OS=Canis lupus<br>familiaris OX=9615 GN=DAD1<br>PE=1 SV=2 | 10 | 1 | 1 | 1 | 119 | 13.1 |
| E2RHG2 | PRDX1   | Peroxiredoxin-1 OS=Canis lupus<br>familiaris OX=9615 GN=PRDX1<br>PE=3 SV=2                                                                   | 5  | 1 | 1 | 1 | 220 | 24.3 |
| E2QYG6 | ATP6V1A | H(+)-transporting two-sector<br>ATPase OS=Canis lupus<br>familiaris OX=9615<br>GN=ATP6V1A PE=3 SV=1                                          | 1  | 1 | 1 | 1 | 618 | 68.4 |
| F1P6U7 | LRRC40  | Leucine rich repeat containing 40<br>OS=Canis lupus familiaris<br>OX=9615 GN=LRRC40 PE=4<br>SV=3                                             | 5  | 1 | 1 | 1 | 552 | 62.9 |

**Table S2.** Primers for sgRNA for gene knockdown.

| Primer  | Sequences (5'-3')        |
|---------|--------------------------|
| sgRNA   | GTTTGCACTAATCGTCTACT-GGG |
| PD-L1 F | AGAGATGAGATCCAGGGTTCCA   |
| PD-L1 R | TAGCCGATCAAGCAGCAGTAAA   |

PCR program: initial denaturation for 3 min at 94°C, 35 cycles at 94 °C for 30s, 62 °C for 35s, 72 °C for 35s, and a final extension step of 5 min at 72°C.
